# Supplementary material for: Application of Nb2O5nanowire supported Pd nanoparticles in reduction of nitro-aromatic compounds as efficient and stable catalysts
Source: Royal Society of Chemistry journal article supplement (doi:10.1039/c4ra05674d), 2014-09-11
Supplement: c4ra05674d1.pdf [file c4ra05674d1.pdf]

## Supplementary material

### 1 Gel of Nb<sub>2</sub>O<sub>5</sub> made in acid and base conditions

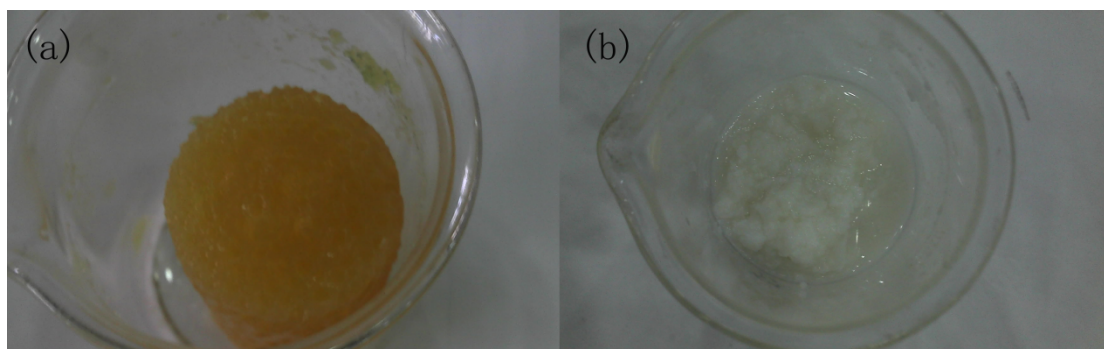

Figure SI-1 (a) PEI-Nb<sub>2</sub>O<sub>5</sub> gel was made in acid condition, (b) PEI-Nb<sub>2</sub>O<sub>5</sub> gel was made in base condition

### 2 ESI-MS spectroscopy (using sodium ion source) of five aniline compounds

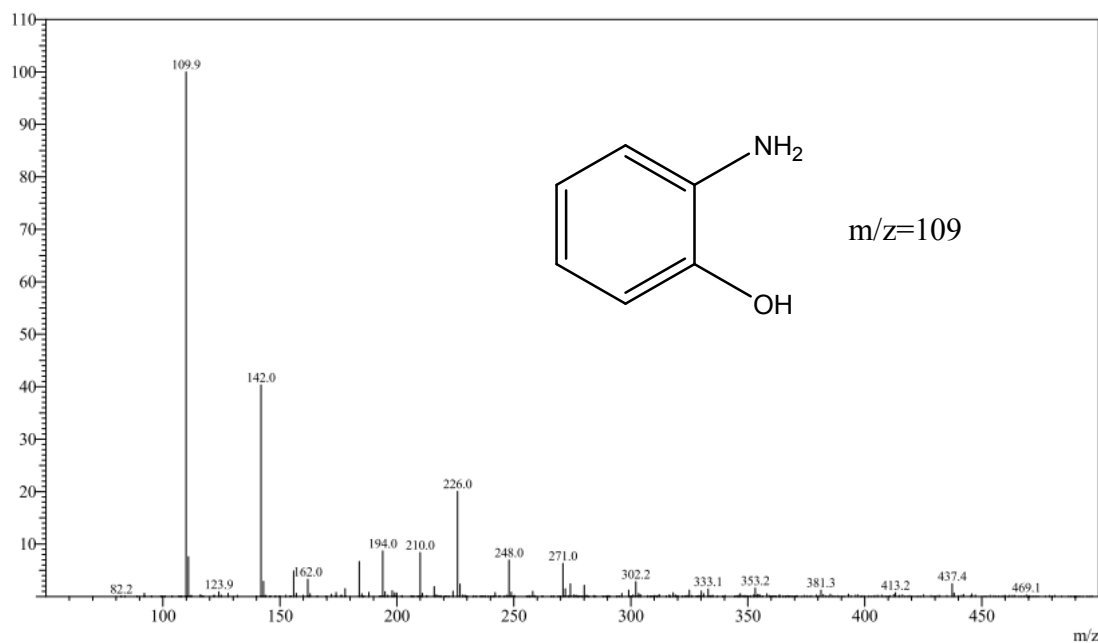

Fig.2 Final product 2-aminophenol from reduction reaction of 2-nitrophenol

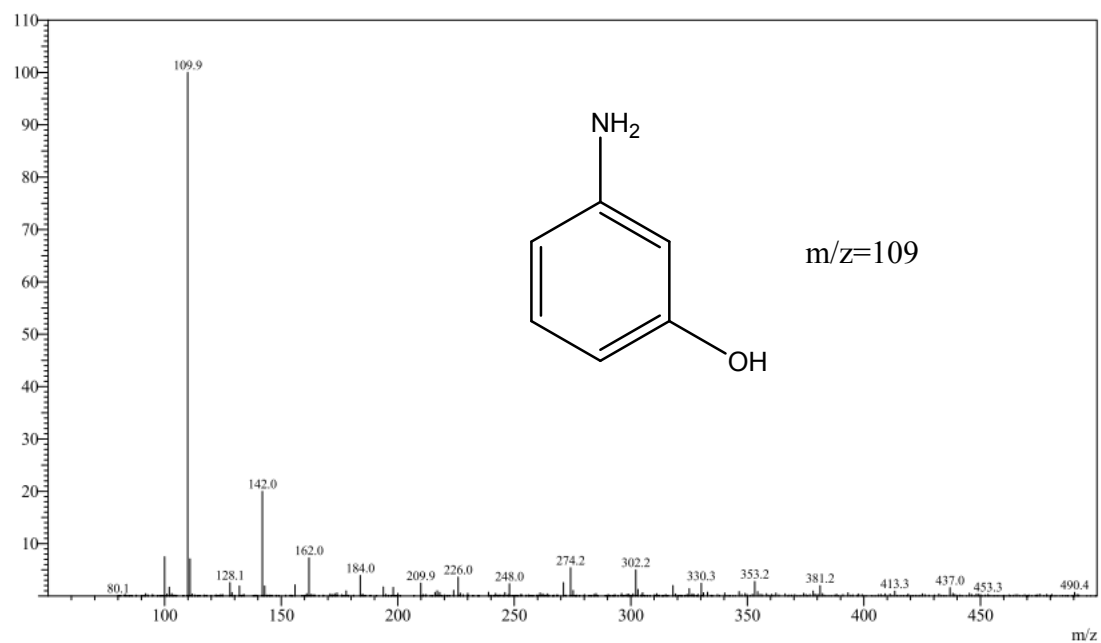

Fig.3 Final product 3-aminophenol from reduction of 3-nitrophenol

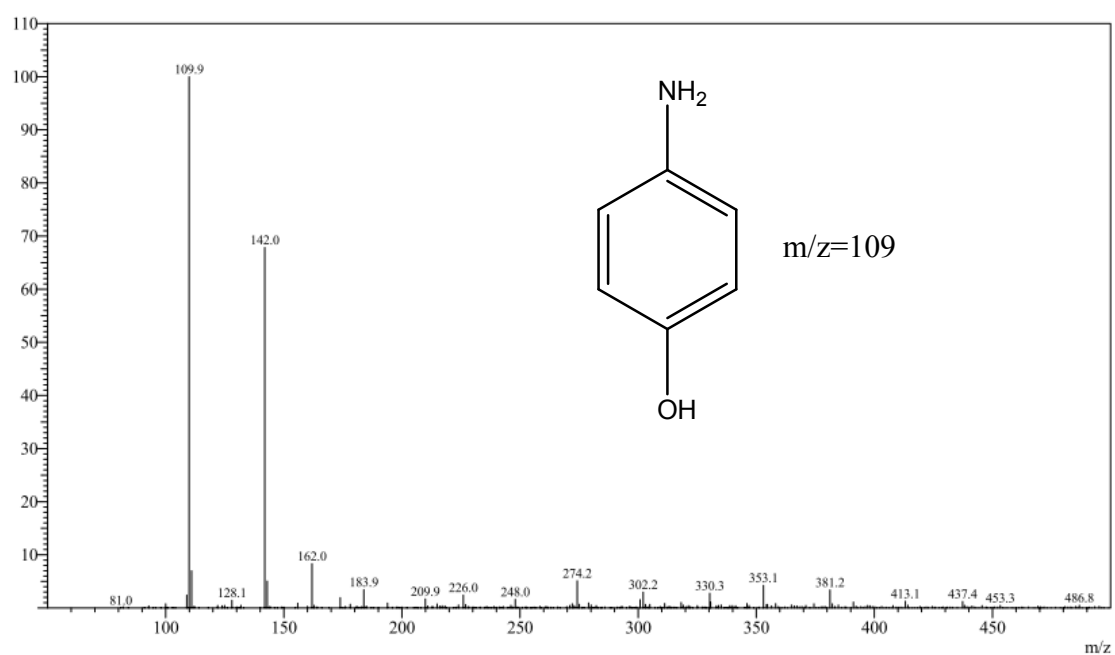

Fig.4 4-aminophenol from reduction of 4-nitrophenol

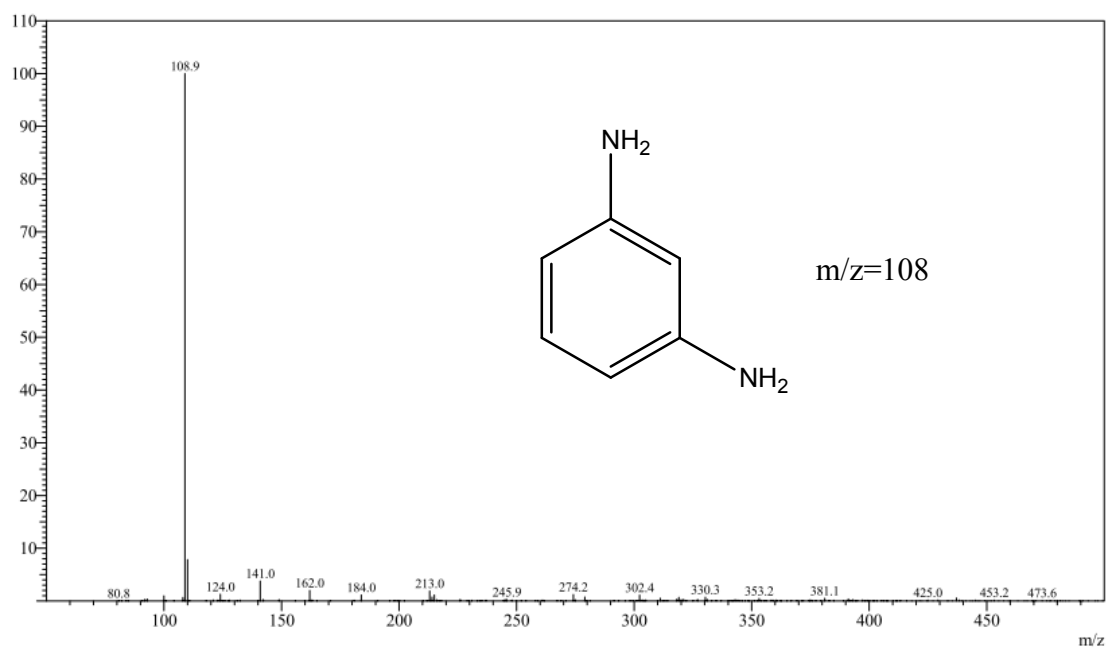

Fig.5 3-aminoaniline from reduction of 3-nitroaniline

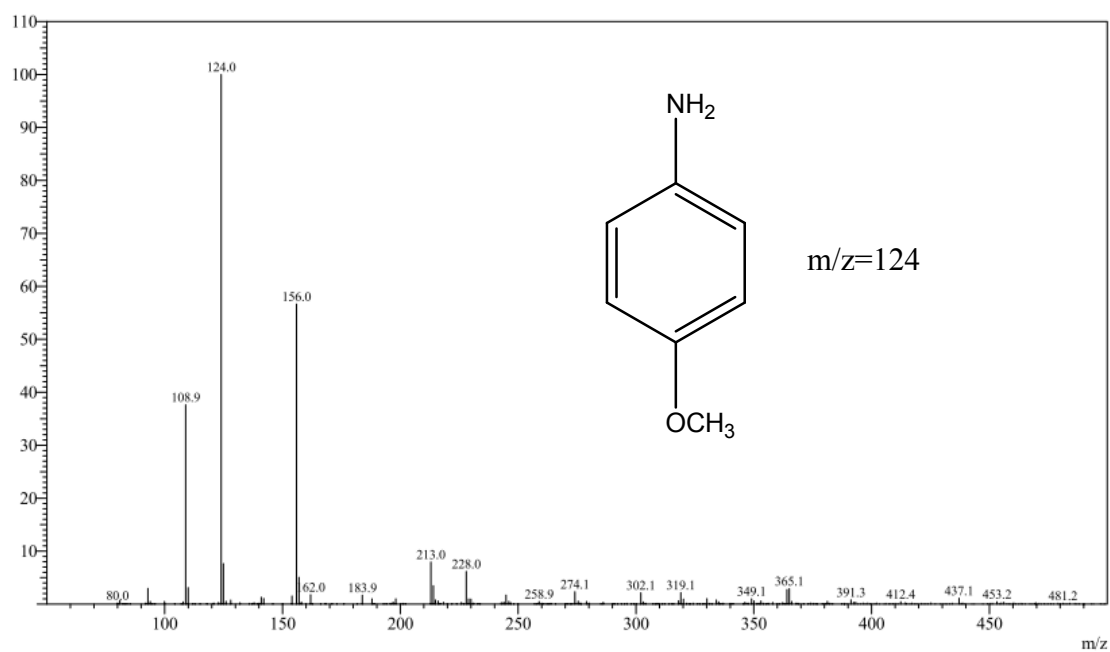

Fig.6 4-aminoanisole from reduction of 4-nitroanisole
